# Supplementary material
Source: publisher figshare collection journal article supplement (https://acs.figshare.com/ndownloader/files/3583281)

## SUPPLEMENTARY FIGURES AND TABLES

### Figure S1. Selection of suitable antibody for immunoprecipitation of recombinant Akt

Recombinant Akt (0.2 $\mu$ g) was immunoprecipitated using one of three antibodies recognising three different regions of Akt. The precipitated proteins were analysed using SDS-PAGE followed by Staining with Simply Blue. The three different antibodies were raised against the amino acid 140-480, 1-149, and 466-480 of Akt, respectively.

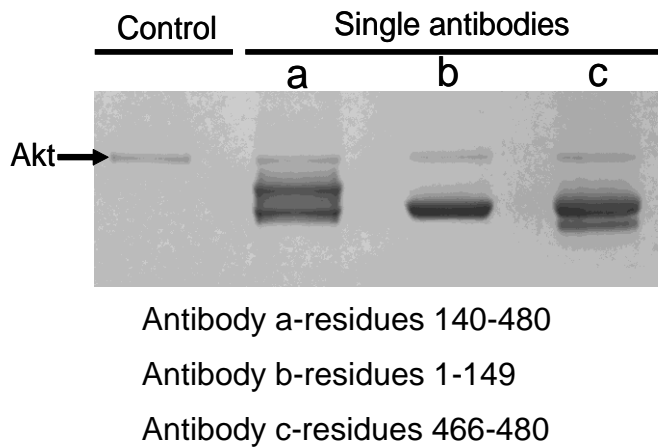

**Figure S2. Efficiency of antibody C (a.a 466-480) in immunoprecipitation of Akt from cell lysates**

Akt was immunoprecipitated from cell lysates of control T cells (low phosphorylation) and pervanadate treated cells. Cell extract of both samples were analysed by western blot before and after IP. Antibody C (a.a. 466-480) was used for both immunoprecipitation and western blot.

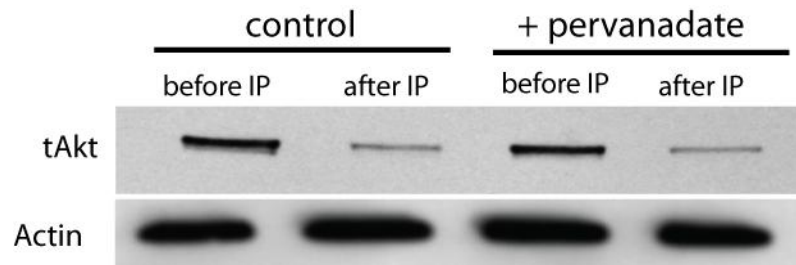

Supplement: Supplementary file 1 [file 3583281]
